# Supplementary material for: Chinese or western finance? Transparency, official credit flows, and the international political economy of development
Source: Springer Nature journal article supplement (doi:10.1007/s11558-022-09469-x), 2022-06-17
Supplement: MOESM2 [file 23179192]

## **Web Appendix**

Cormier “Chinese or Western Finance?” forthcoming, *Review of International Organizations*.

### Additional Data

- A. Variable sources and further details
- B. Countries in complete-case sample
- C. Descriptive Statistics for complete cases in samples with imputed HRV  
Transparency scores

### Robustness Tests: Other Data

- D. ODA only (OECD CRS and AidData ODA-like only)
- E. China IDS data (rather than AidData)

### Robustness Tests: Imputation Alternatives

- F. Transparency International for post-2010 Transparency values
- G. Re-Estimated HRV Index
- H. Extended 2010 HRV values

### Robustness Tests: Alternative Specifications

- I. Amount DVs (ln\_ChFinance)
- J. No lags at all
- K. Simple random effect models

### Appendix A: Main Model Data & Variable Details

| <u>Variable Name</u>              | <u>Source</u>                     | <u>Coding Notes</u>                                                                                                                      |
|-----------------------------------|-----------------------------------|------------------------------------------------------------------------------------------------------------------------------------------|
| ChnFinance_PerTotal               | AidData & IDS                     | Raw value of Chinese flows over total official flows (see main text). See below for IDS data details.                                    |
| ChnFinance_PerTotalNoIMF          | AidData & IDS                     | Raw value of Chinese flows over total official flows, minus IMF credit (see main text). See below for IDS data details.                  |
| ChnFinance_vsAllWestNoIMF         | AidData & IDS                     | Raw value of Chinese flows over total official flows, minus IMF and non-OECD bilaterals (see main text). See below for IDS data details. |
| ChinaFinance_vsOECEDBilateralOnly | AidData & IDS                     | Raw value of Chinese flows over only OECD bilateral flows (see main text). See below for IDS data details.                               |
| Transparency                      | HRV                               | Transparency index                                                                                                                       |
| GDPpcap                           | WDI                               | NY.GDP.PCAP.KD                                                                                                                           |
| GDPgrowth                         | WDI                               | NY.GDP.MKTP.KD.ZG                                                                                                                        |
| SovDebtCrisis                     | Laeven & Valenvia 2018 update     | Sovereign debt crisis = 1                                                                                                                |
| BondDummy                         | Ballard-Rosa, Mosley & Wellhausen | Any long-term bond (greater than one year in maturity) issued that year = 1                                                              |
| ln_ExpsToChn                      | IMF Direction of Trade            | China's annual imports from counterpart countries                                                                                        |
| ln_ImpsFromChn                    | IMF Direction of Trade            | China's annual exports to counterpart countries                                                                                          |
| PTAwChn                           | DESTA                             | Any current or previous trade agreement with China = 1                                                                                   |
| TaiwanRecog                       | Rich 2011 & Dreher 2022           | =1 if country recognized Taiwan that year; based on Rich extended by Dreher                                                              |
| OilDummy                          | British Geological Survey         | Following Dreher et al (2018), code 1 if oil producer in 1999                                                                            |
| agreeUS                           | Bailey, Strezhnev & Voeten        |                                                                                                                                          |
| Democracy                         | Varieties of Democracy            | v2x_polyarchy                                                                                                                            |
| Corruption                        | Varieties of Democracy            | v2xnp_regcorr                                                                                                                            |
| Left                              | DPI                               | Using GOV1RLC, 1 = Left, 0 = other                                                                                                       |
| TariffRate                        | WDI                               | TM.TAX.MRCH.SM.AR.ZS, imputed due to gaps in WDI output                                                                                  |

#### **Notes on non-Chinese Official Borrowing Data and Variables:**

IDS provides information on non-Chinese official credit. For the World Bank we include IBRD (DT.COM.MIBR.CD) and IDA (DT.COM.MIDA.CD) commitments. For the IMF, we use DT.DIS.DIMF.CD. For major regional multilaterals we include commitments from the IADB, ADB, and AfDB via IDS variable DT.COM.OFFT.CD (components 909, 915, and 913, respectively). For non-Chinese bilateral commitments we use IDS variable DT.COM.BLAT.CD, select all countries other than China, and sum those commitments. For OECD-only bilateral commitments, we use the same IDS variable DT.COM.BLAT.CD but select only OECD countries (countries that were OECD as of March 2022). A complete list of those countries or the raw data pull from the IDS is available from the author on request.

**Appendix B : 55 Countries in Complete  
Case Sample**

|                    |                    |
|--------------------|--------------------|
| Angola             | Kenya              |
| Albania            | Lebanon            |
| Argentina          | Sri Lanka          |
| Benin              | Lesotho            |
| Burkina Faso       | Morocco            |
| Bangladesh         | Mexico             |
| Bulgaria           | Mongolia           |
| Bolivia            | Mozambique         |
| Brazil             | Nigeria            |
| Botswana           | Nicaragua          |
| Cote d'Ivoire      | Pakistan           |
| Cameroon           | Peru               |
| Congo, Rep.        | Philippines        |
| Colombia           | Papua New Guinea   |
| Costa Rica         | Paraguay           |
| Dominican Republic | Russian Federation |
| Ecuador            | Rwanda             |
| Egypt, Arab Rep.   | Senegal            |
| Ethiopia           | El Salvador        |
| Fiji               | Thailand           |
| Gabon              | Tunisia            |
| Ghana              | Turkey             |
| Guatemala          | Uganda             |
| Honduras           | Venezuela, RB      |
| Indonesia          | Vietnam            |
| India              | South Africa       |
| Jamaica            | Zambia             |
| Jordan             |                    |

Exact country-years in sample vary by model specification. This list is drawn from the sample used in Table 2 Model 3. See replication data for country-years in each model.

**Appendix C: Descriptive Statistics for Complete Cases in Table 3 Models with PMM-Imputed  
Transparency (extends data to 2017)**

| Variable                                           | Mean    | Min    | Max      | SD      |
|----------------------------------------------------|---------|--------|----------|---------|
| <b>Dependent Variables</b>                         |         |        |          |         |
| ChnFinance_PerTotal                                | 0.21    | 0.00   | 1.00     | 0.31    |
| ChnFinance_PerTotalNoIMF                           | 0.22    | 0.00   | 1.00     | 0.32    |
| ChnFinance_vsAllWestNoIMF                          | 0.23    | 0.00   | 1.00     | 0.33    |
| ChinaFinance_vsOECSBilateralOnly                   | 0.46    | 0.00   | 1.00     | 0.44    |
| <b>Explanatory Variable</b>                        |         |        |          |         |
| Transparency                                       | 1.63    | -1.22  | 8.22     | 1.83    |
| <b>Macro &amp; Public Finance Controls</b>         |         |        |          |         |
| GDPpcap                                            | 3755.37 | 194.87 | 14735.09 | 3085.86 |
| GDPgrowth                                          | 4.63    | -14.76 | 34.47    | 3.84    |
| BondDummy                                          | 0.47    | 0.00   | 1.00     | 0.50    |
| SovDebtCrisis                                      | 0.04    | 0.00   | 1.00     | 0.19    |
| <b>Pol-Econ Ties to China &amp; West Controls</b>  |         |        |          |         |
| ln_ImpsFromChn                                     | 6.62    | 0.76   | 11.10    | 2.09    |
| ln_ExpsToChn                                       | 5.48    | 0.00   | 10.89    | 2.72    |
| PTAwChn                                            | 0.13    | 0.00   | 1.00     | 0.34    |
| TaiwanRecog                                        | 0.09    | 0.00   | 1.00     | 0.29    |
| OilDummy                                           | 0.64    | 0.00   | 1.00     | 0.48    |
| agreeUS                                            | 0.33    | 0.11   | 0.81     | 0.12    |
| <b>Political and Borrowing Preference Controls</b> |         |        |          |         |
| Democracy                                          | 0.51    | 0.13   | 0.93     | 0.20    |
| Corruption                                         | 0.61    | 0.11   | 0.97     | 0.22    |
| Left                                               | 0.30    | 0.00   | 1.00     | 0.46    |
| TariffRate                                         | 10.29   | 0.43   | 40.91    | 5.42    |

### Appendix D: OECD CRS ODA data only

These models use only ODA-like flows and OECD CRS data (*ChnODA\_PerTotalODA*), providing a test of both only ODA flows and an alternative dataset from the IDS. CRS data is in net disbursements, do negative flows are turned to zeros, further reason to use this as a robustness test. Results persist

$$ChnODA\_PerTotalODA = \frac{ChnODA}{(ChnODA + WestODA)}$$

| <b>Appendix: ODA only (using CRS)</b> |                      |                      |                      |                      |
|---------------------------------------|----------------------|----------------------|----------------------|----------------------|
| HRV<br>Model #                        | Raw Only             |                      | Imputed              |                      |
|                                       | 1                    | 2                    | 3                    | 4                    |
| Transparency                          | -0.144*<br>(0.064)   | -0.140**<br>(0.054)  | -0.119*<br>(0.059)   | -0.125**<br>(0.046)  |
| DVlag                                 |                      | 1.218*<br>(0.531)    |                      | 1.364***<br>(0.283)  |
| GDPpcap                               | 0.000<br>(0.000)     | 0.000<br>(0.000)     | 0.000*<br>(0.000)    | 0.000*<br>(0.000)    |
| GDPgrowth                             | -0.038<br>(0.023)    | -0.025<br>(0.017)    | -0.015<br>(0.012)    | -0.009<br>(0.010)    |
| BondDummy                             | -0.059<br>(0.148)    | -0.057<br>(0.117)    | -0.073<br>(0.116)    | -0.072<br>(0.091)    |
| SovDebtCrisis                         | -0.156<br>(0.251)    | -0.021<br>(0.192)    | -0.197<br>(0.224)    | -0.128<br>(0.155)    |
| ln_ImpsFromChn                        | -0.221***<br>(0.064) | -0.187***<br>(0.054) | -0.144*<br>(0.061)   | -0.096*<br>(0.046)   |
| ln_ExpsToChn                          | 0.129*<br>(0.053)    | 0.106**<br>(0.036)   | 0.060<br>(0.042)     | 0.035<br>(0.030)     |
| PTAwChn                               | 1.036***<br>(0.248)  | 0.849***<br>(0.191)  | 0.897***<br>(0.199)  | 0.675***<br>(0.149)  |
| TaiwanRecog                           | -1.774***<br>(0.384) | -1.623***<br>(0.349) | -1.282***<br>(0.377) | -1.093***<br>(0.331) |
| OilDummy                              | -0.400<br>(0.206)    | -0.333<br>(0.170)    | -0.071<br>(0.132)    | -0.079<br>(0.101)    |
| agreeUS                               | 0.449<br>(1.080)     | 0.496<br>(1.007)     | -1.824*<br>(0.748)   | -1.317*<br>(0.660)   |
| Democracy                             | 0.745<br>(0.506)     | 0.705<br>(0.370)     | 0.519<br>(0.413)     | 0.443<br>(0.301)     |
| Corruption                            | 0.397<br>(0.475)     | 0.310<br>(0.371)     | 0.220<br>(0.362)     | 0.135<br>(0.272)     |
| Left                                  | -0.185<br>(0.165)    | -0.139<br>(0.122)    | -0.135<br>(0.151)    | -0.092<br>(0.105)    |
| TariffRate                            | 0.018<br>(0.013)     | 0.014<br>(0.011)     | 0.028<br>(0.014)     | 0.024*<br>(0.011)    |
| N                                     | 605                  | 600                  | 1065                 | 1054                 |
| Year Effects                          | YES                  | YES                  | YES                  | YES                  |
| Unit-Cluster Robust St. Errors        | YES                  | YES                  | YES                  | YES                  |

\* p<0.05 \*\* p<0.01 \*\*\* p<0.001  
Notes: Constants Suppressed

**Appendix E: IDS China Data (rather than AidData)**

These models indicate the small N in IDS China data compared to AidData, though simple correlations still indicate evidence in support of H1

**Appendix: China IDS Data (not AidData)**

|              | Raw HRV              | Imputed HRV          |
|--------------|----------------------|----------------------|
| Transparency | -0.312***<br>(0.056) | -0.190***<br>(0.044) |
| N            | 211                  | 328                  |

\* p<0.05 \*\* p<0.01 \*\*\* p<0.001

All multilateral and OECD bilateral included  
in denominator

## Appendix F: Transparency International for post 2010 Transparency values

These models use the Transparency International (TI) corruption perceptions index to fill post-2010 *Transparency* values. TI scores are available from 2012-2022. We take these scores and standardize them. We then take raw HRV scores which are available until 2010, carry 2010 values into 2011 to cover the gap until TI is available, and standardize them. We then merge the standardized HRV and standardized TI scores into one new index of transparency. This is imperfect because HRV and TI are different measures of government transparency. But this is useful for creating a variable that captures real-world changes in transparency after 2010 that predictive mean matching may not be able to capture.

We estimate all the same probit models as in the main Tables (2 and 3). The relationships are often stronger and significant at higher levels than those in the main text tables. In the full models (3, 6, 9, and 12) a one-standard deviation increase or decrease in this HRV+TI index is associated with around 20% shifts in Chinese vis-a-vis other official flows across DVs (see full model coefficients).

| DV             | <b>Appendix: Transparency International scores for post 2010 Transparency Values</b> |                      |                      |                      |                      |                      |                               |                      |                      |                      |                      |                      |
|----------------|--------------------------------------------------------------------------------------|----------------------|----------------------|----------------------|----------------------|----------------------|-------------------------------|----------------------|----------------------|----------------------|----------------------|----------------------|
|                | All Credit Sources                                                                   |                      |                      | No IMF               |                      |                      | OECD Bilat & Non-IMF Multilat |                      |                      | OECD Bilateral Only  |                      |                      |
| Model #        | 1                                                                                    | 2                    | 3                    | 4                    | 5                    | 6                    | 7                             | 8                    | 9                    | 10                   | 11                   | 12                   |
| Transparency   | -0.334***<br>(0.038)                                                                 | -0.267**<br>(0.095)  | -0.197*<br>(0.080)   | -0.372***<br>(0.039) | -0.267**<br>(0.093)  | -0.198*<br>(0.078)   | -0.376***<br>(0.038)          | -0.283**<br>(0.095)  | -0.213**<br>(0.080)  | -0.504***<br>(0.039) | -0.351**<br>(0.110)  | -0.216**<br>(0.080)  |
| DVlag          |                                                                                      | 0.000**<br>(0.000)   | 0.000**<br>(0.000)   |                      | 0.000**<br>(0.000)   | 0.000*<br>(0.000)    |                               | 0.000**<br>(0.000)   | 0.000**<br>(0.000)   |                      | 0.000<br>(0.000)     | 0.000*<br>(0.000)    |
| GDPpcap        |                                                                                      | -0.004<br>(0.013)    | -0.005<br>(0.012)    |                      | -0.003<br>(0.012)    | -0.005<br>(0.012)    |                               | -0.003<br>(0.014)    | -0.004<br>(0.013)    |                      | 0.000<br>(0.013)     | -0.006<br>(0.013)    |
| GDPgrowth      |                                                                                      | -0.329**<br>(0.106)  | -0.231**<br>(0.086)  |                      | -0.318**<br>(0.105)  | -0.223**<br>(0.085)  |                               | -0.328**<br>(0.108)  | -0.228*<br>(0.089)   |                      | -0.450***<br>(0.127) | -0.274**<br>(0.104)  |
| BondDummy      |                                                                                      | -0.342<br>(0.187)    | -0.173<br>(0.165)    |                      | -0.220<br>(0.226)    | -0.074<br>(0.184)    |                               | -0.380<br>(0.204)    | -0.299<br>(0.164)    |                      | -0.234<br>(0.276)    | -0.395<br>(0.230)    |
| SovDebtCrisis  |                                                                                      | -0.088<br>(0.059)    | -0.073<br>(0.047)    |                      | -0.085<br>(0.059)    | -0.064<br>(0.047)    |                               | -0.093<br>(0.060)    | -0.079<br>(0.047)    |                      | -0.110<br>(0.076)    | -0.094<br>(0.055)    |
| ln_ImpsFromChn |                                                                                      | 0.150***<br>(0.043)  | 0.126***<br>(0.033)  |                      | 0.143***<br>(0.043)  | 0.120***<br>(0.033)  |                               | 0.152***<br>(0.043)  | 0.130***<br>(0.033)  |                      | 0.154**<br>(0.051)   | 0.115**<br>(0.035)   |
| ln_ExpsToChn   |                                                                                      | -0.137<br>(0.196)    | -0.080<br>(0.159)    |                      | -0.123<br>(0.203)    | -0.078<br>(0.164)    |                               | -0.164<br>(0.197)    | -0.093<br>(0.158)    |                      | -0.220<br>(0.243)    | -0.070<br>(0.169)    |
| PTAwChn        |                                                                                      | -1.469***<br>(0.281) | -1.205***<br>(0.261) |                      | -1.510***<br>(0.283) | -1.241***<br>(0.262) |                               | -1.618***<br>(0.288) | -1.326***<br>(0.269) |                      | -2.158***<br>(0.292) | -1.227***<br>(0.246) |
| TaiwanRecog    |                                                                                      | -0.304<br>(0.176)    | -0.267<br>(0.139)    |                      | -0.313<br>(0.181)    | -0.285*<br>(0.143)   |                               | -0.372*<br>(0.176)   | -0.323*<br>(0.136)   |                      | -0.785**<br>(0.243)  | -0.514**<br>(0.159)  |
| OilDummy       |                                                                                      | -0.193<br>(0.834)    | -0.018<br>(0.669)    |                      | -0.002<br>(0.827)    | 0.222<br>(0.670)     |                               | -0.287<br>(0.814)    | -0.110<br>(0.649)    |                      | 0.040<br>(1.005)     | 0.261<br>(0.748)     |
| agreeUS        |                                                                                      | -0.501               | -0.350               |                      | -0.482               | -0.328               |                               | -0.570               | -0.393               |                      | 0.263                | 0.098                |

|              |      |         |         |      |         |         |      |         |         |      |         |         |
|--------------|------|---------|---------|------|---------|---------|------|---------|---------|------|---------|---------|
|              |      | (0.456) | (0.346) |      | (0.453) | (0.345) |      | (0.460) | (0.349) |      | (0.457) | (0.328) |
| Democracy    |      | -0.216  | -0.110  |      | -0.200  | -0.111  |      | -0.122  | -0.053  |      | -0.010  | -0.047  |
|              |      | (0.399) | (0.314) |      | (0.389) | (0.307) |      | (0.387) | (0.305) |      | (0.398) | (0.288) |
| Corruption   |      | -0.002  | 0.013   |      | 0.031   | 0.038   |      | 0.035   | 0.025   |      | 0.096   | 0.044   |
|              |      | (0.116) | (0.091) |      | (0.116) | (0.092) |      | (0.121) | (0.096) |      | (0.133) | (0.096) |
| Left         |      | 0.000   | 0.002   |      | 0.002   | 0.003   |      | -0.002  | 0.001   |      | 0.004   | 0.005   |
|              |      | (0.012) | (0.010) |      | (0.012) | (0.010) |      | (0.013) | (0.010) |      | (0.015) | (0.011) |
| TariffRate   |      | 0.001   | 0.002   |      | 0.002   | 0.003   |      | -0.003  | -0.001  |      | 0.002   | 0.001   |
|              |      | (0.014) | (0.011) |      | (0.014) | (0.011) |      | (0.014) | (0.011) |      | (0.016) | (0.012) |
| N            | 1475 | 893     | 879     | 1470 | 892     | 877     | 1468 | 892     | 877     | 1354 | 846     | 784     |
| Year Effects | NO   | YES     | YES     |
| Unit-Cluster | NO   | YES     | YES     |

\* p<0.05 \*\* p<0.01 \*\*\* p<0.001

Notes: Constants Suppressed



### Appendix G: Re-estimated HRV Index

These models are based on a re-estimation of HRV's transparency index to include post 2010 values. We first identify how many of HRV's original variables are still in the World Development Indicators (WDI). Of the 240 original HRV variables we are able to find 161 identically named variables (list available on request). We then download all of these variables from WDI for 1999-2018, to fit the AidData timeframe. We re-estimate all years, rather than append post-2010 to original raw HRV values, so that the re-estimated values are comparable over time.

Following HRV's premise that transparency is a function of reporting to the WDI, we calculate the percentage of the 161 WDI variables missing each year, per country. We then invert this percentage so that 100% equals full transparency and 0% equals no transparency. This matches the HRV scale, where higher scores equal more transparency.

We estimate all the same probit models as in the main Tables 2 and 3. Results are significant in the expected direction. Given this re-estimated *Transparency* variable is a percentage, these coefficients are the % change in Chinese financial flows for every one-percent change in *Transparency*.

| DV<br>Model #  | Appendix: Re-Estimated HRV Transparency Index |                     |                      |                      |                      |                               |                      |                     |                     |                      |                      |                     |
|----------------|-----------------------------------------------|---------------------|----------------------|----------------------|----------------------|-------------------------------|----------------------|---------------------|---------------------|----------------------|----------------------|---------------------|
|                | All Credit Sources                            |                     |                      | No IMF               |                      | OECD Bilat & Non-IMF Multilat |                      |                     |                     | OECD Bilateral Only  |                      |                     |
|                | 1                                             | 2                   | 3                    | 4                    | 5                    | 6                             | 7                    | 8                   | 9                   | 10                   | 11                   | 12                  |
| Transparency   | -1.998***<br>(0.186)                          | -2.679**<br>(0.815) | -2.262***<br>(0.662) | -2.302***<br>(0.187) | -2.679***<br>(0.805) | -2.264***<br>(0.662)          | -2.128***<br>(0.185) | -2.382**<br>(0.900) | -1.921**<br>(0.730) | -3.773***<br>(0.264) | -3.465**<br>(1.148)  | -2.229**<br>(0.816) |
| DVlag          |                                               |                     | 0.851***<br>(0.146)  |                      |                      | 0.844***<br>(0.146)           |                      |                     | 0.892***<br>(0.140) |                      |                      | 1.167***<br>(0.139) |
| GDPpcap        |                                               | 0.000*<br>(0.000)   | 0.000*<br>(0.000)    |                      | 0.000*<br>(0.000)    | 0.000<br>(0.000)              |                      | 0.000**<br>(0.000)  | 0.000*<br>(0.000)   |                      | 0.000<br>(0.000)     | 0.000<br>(0.000)    |
| GDPgrowth      |                                               | -0.011<br>(0.011)   | -0.011<br>(0.010)    |                      | -0.010<br>(0.011)    | -0.011<br>(0.010)             |                      | -0.007<br>(0.012)   | -0.008<br>(0.011)   |                      | -0.008<br>(0.012)    | -0.011<br>(0.012)   |
| BondDummy      |                                               | -0.331**<br>(0.110) | -0.237**<br>(0.091)  |                      | -0.320**<br>(0.109)  | -0.228*<br>(0.091)            |                      | -0.329**<br>(0.110) | -0.227*<br>(0.091)  |                      | -0.437***<br>(0.128) | -0.262*<br>(0.103)  |
| SovDebtCrisis  |                                               | -0.308*<br>(0.151)  | -0.158<br>(0.143)    |                      | -0.198<br>(0.175)    | -0.070<br>(0.157)             |                      | -0.355*<br>(0.175)  | -0.264<br>(0.157)   |                      | -0.266<br>(0.228)    | -0.343<br>(0.208)   |
| ln_ImpsFromChn |                                               | -0.011<br>(0.060)   | -0.002<br>(0.048)    |                      | -0.010<br>(0.060)    | 0.001<br>(0.048)              |                      | -0.046<br>(0.069)   | -0.033<br>(0.056)   |                      | -0.024<br>(0.084)    | -0.032<br>(0.061)   |
| ln_ExpsToChn   |                                               | 0.123**<br>(0.046)  | 0.101**<br>(0.035)   |                      | 0.117*<br>(0.045)    | 0.097**<br>(0.035)            |                      | 0.129**<br>(0.046)  | 0.106**<br>(0.035)  |                      | 0.110*<br>(0.050)    | 0.082*<br>(0.037)   |
| PTAwChn        |                                               | -0.200<br>(0.196)   | -0.134<br>(0.160)    |                      | -0.188<br>(0.204)    | -0.130<br>(0.167)             |                      | -0.218<br>(0.195)   | -0.141<br>(0.156)   |                      | -0.313<br>(0.228)    | -0.137<br>(0.158)   |

|              |      |           |           |      |           |           |      |           |           |      |           |           |
|--------------|------|-----------|-----------|------|-----------|-----------|------|-----------|-----------|------|-----------|-----------|
| TaiwanRecog  |      | -1.493*** | -1.207*** |      | -1.489*** | -1.182*** |      | -1.626*** | -1.303*** |      | -2.078*** | -1.190*** |
|              |      | (0.300)   | (0.271)   |      | (0.288)   | (0.261)   |      | (0.312)   | (0.279)   |      | (0.309)   | (0.277)   |
| OilDummy     |      | -0.276    | -0.219    |      | -0.281    | -0.232    |      | -0.271    | -0.220    |      | -0.652**  | -0.426**  |
|              |      | (0.162)   | (0.127)   |      | (0.166)   | (0.130)   |      | (0.179)   | (0.137)   |      | (0.227)   | (0.161)   |
| agreeUS      |      | -0.922    | -0.601    |      | -0.762    | -0.399    |      | -1.313    | -0.930    |      | -0.684    | -0.127    |
|              |      | (0.770)   | (0.592)   |      | (0.763)   | (0.594)   |      | (0.788)   | (0.610)   |      | (0.924)   | (0.646)   |
| Democracy    |      | -0.522    | -0.365    |      | -0.506    | -0.348    |      | -0.767    | -0.522    |      | 0.118     | -0.020    |
|              |      | (0.403)   | (0.306)   |      | (0.402)   | (0.310)   |      | (0.448)   | (0.339)   |      | (0.483)   | (0.343)   |
| Corruption   |      | 0.044     | 0.094     |      | 0.071     | 0.106     |      | 0.040     | 0.085     |      | 0.464     | 0.272     |
|              |      | (0.378)   | (0.290)   |      | (0.371)   | (0.285)   |      | (0.391)   | (0.298)   |      | (0.405)   | (0.290)   |
| Left         |      | 0.087     | 0.091     |      | 0.114     | 0.111     |      | 0.134     | 0.102     |      | 0.222     | 0.142     |
|              |      | (0.116)   | (0.090)   |      | (0.114)   | (0.090)   |      | (0.118)   | (0.093)   |      | (0.125)   | (0.089)   |
| TariffRate   |      | -0.005    | -0.003    |      | -0.004    | -0.002    |      | -0.010    | -0.006    |      | -0.007    | -0.005    |
|              |      | (0.014)   | (0.011)   |      | (0.014)   | (0.012)   |      | (0.015)   | (0.011)   |      | (0.016)   | (0.012)   |
| N            | 1903 | 1016      | 1001      | 1891 | 1012      | 994       | 1884 | 1014      | 998       | 1698 | 947       | 872       |
| Year Effects | NO   | YES       | YES       |
| Unit-Cluster | NO   | YES       | YES       |

Robust St. Errors

\* p<0.05 \*\* p<0.01 \*\*\* p<0.001

Notes: Constants Suppressed

### Appendix H: Extended HRV values from 2010 through 2011-2017 (not imputed)

These models are the same as in Table 3 in the main text, but extend HRV 2010 values through 2011-2017 rather than use predictive mean matching.

| DV<br>Model #                  | <b>Appendix: HRV Extended from 2010 (not imputed using predictive mean matching)</b> |                      |                      |                      |                      |                      |                               |                      |                      |                      |                      |                      |
|--------------------------------|--------------------------------------------------------------------------------------|----------------------|----------------------|----------------------|----------------------|----------------------|-------------------------------|----------------------|----------------------|----------------------|----------------------|----------------------|
|                                | All Credit Sources                                                                   |                      |                      | No IMF               |                      |                      | OECD Bilat & Non-IMF Multilat |                      |                      | OECD Bilateral Only  |                      |                      |
|                                | 13                                                                                   | 14                   | 15                   | 16                   | 17                   | 18                   | 19                            | 20                   | 21                   | 22                   | 23                   | 24                   |
| Transparency                   | -0.141***<br>(0.018)                                                                 | -0.162**<br>(0.051)  | -0.135**<br>(0.043)  | -0.168***<br>(0.019) | -0.158**<br>(0.050)  | -0.133**<br>(0.042)  | -0.165***<br>(0.018)          | -0.173***<br>(0.051) | -0.146***<br>(0.044) | -0.278***<br>(0.022) | -0.190**<br>(0.064)  | -0.129**<br>(0.044)  |
| DVlag                          |                                                                                      |                      | 0.761***<br>(0.161)  |                      |                      | 0.774***<br>(0.165)  |                               |                      | 0.739***<br>(0.164)  |                      |                      | 1.093***<br>(0.159)  |
| GDPpcap                        |                                                                                      | 0.000**<br>(0.000)   | 0.000**<br>(0.000)   |                      | 0.000**<br>(0.000)   | 0.000*<br>(0.000)    |                               | 0.000***<br>(0.000)  | 0.000**<br>(0.000)   |                      | 0.000<br>(0.000)     | 0.000<br>(0.000)     |
| GDPgrowth                      |                                                                                      | -0.013<br>(0.014)    | -0.016<br>(0.012)    |                      | -0.013<br>(0.013)    | -0.016<br>(0.012)    |                               | -0.012<br>(0.015)    | -0.014<br>(0.014)    |                      | -0.008<br>(0.014)    | -0.014<br>(0.013)    |
| BondDummy                      |                                                                                      | -0.337**<br>(0.113)  | -0.242*<br>(0.097)   |                      | -0.325**<br>(0.111)  | -0.232*<br>(0.097)   |                               | -0.329**<br>(0.115)  | -0.235*<br>(0.101)   |                      | -0.436**<br>(0.136)  | -0.257*<br>(0.112)   |
| SovDebtCrisis                  |                                                                                      | -0.362<br>(0.199)    | -0.192<br>(0.176)    |                      | -0.233<br>(0.240)    | -0.082<br>(0.196)    |                               | -0.400<br>(0.220)    | -0.326<br>(0.179)    |                      | -0.184<br>(0.286)    | -0.314<br>(0.225)    |
| ln_ImpsFromChn                 |                                                                                      | -0.087<br>(0.064)    | -0.066<br>(0.052)    |                      | -0.085<br>(0.064)    | -0.057<br>(0.052)    |                               | -0.092<br>(0.065)    | -0.074<br>(0.053)    |                      | -0.124<br>(0.080)    | -0.101<br>(0.059)    |
| ln_ExpsToChn                   |                                                                                      | 0.172***<br>(0.043)  | 0.152***<br>(0.033)  |                      | 0.166***<br>(0.043)  | 0.145***<br>(0.032)  |                               | 0.176***<br>(0.043)  | 0.156***<br>(0.033)  |                      | 0.192***<br>(0.050)  | 0.150***<br>(0.034)  |
| PTAwChn                        |                                                                                      | -0.117<br>(0.205)    | -0.080<br>(0.169)    |                      | -0.103<br>(0.213)    | -0.078<br>(0.175)    |                               | -0.148<br>(0.206)    | -0.097<br>(0.169)    |                      | -0.211<br>(0.251)    | -0.082<br>(0.177)    |
| TaiwanRecog                    |                                                                                      | -1.509***<br>(0.296) | -1.256***<br>(0.279) |                      | -1.552***<br>(0.298) | -1.289***<br>(0.280) |                               | -1.667***<br>(0.299) | -1.390***<br>(0.284) |                      | -2.245***<br>(0.300) | -1.301***<br>(0.248) |
| OilDummy                       |                                                                                      | -0.431*<br>(0.184)   | -0.384*<br>(0.152)   |                      | -0.443*<br>(0.189)   | -0.403**<br>(0.155)  |                               | -0.508**<br>(0.183)  | -0.447**<br>(0.149)  |                      | -0.985***<br>(0.244) | -0.686***<br>(0.160) |
| agreeUS                        |                                                                                      | 0.754<br>(1.044)     | 0.843<br>(0.865)     |                      | 0.941<br>(1.043)     | 1.092<br>(0.863)     |                               | 0.662<br>(1.020)     | 0.716<br>(0.839)     |                      | 1.236<br>(1.388)     | 1.458<br>(1.041)     |
| Democracy                      |                                                                                      | -0.580<br>(0.472)    | -0.434<br>(0.364)    |                      | -0.554<br>(0.469)    | -0.400<br>(0.363)    |                               | -0.639<br>(0.475)    | -0.474<br>(0.369)    |                      | 0.254<br>(0.451)     | 0.098<br>(0.329)     |
| Corruption                     |                                                                                      | -0.019<br>(0.407)    | 0.058<br>(0.329)     |                      | -0.000<br>(0.399)    | 0.060<br>(0.324)     |                               | 0.110<br>(0.393)     | 0.148<br>(0.317)     |                      | 0.156<br>(0.404)     | 0.013<br>(0.297)     |
| Left                           |                                                                                      | 0.009<br>(0.117)     | 0.021<br>(0.095)     |                      | 0.042<br>(0.117)     | 0.047<br>(0.095)     |                               | 0.042<br>(0.122)     | 0.032<br>(0.100)     |                      | 0.105<br>(0.136)     | 0.050<br>(0.099)     |
| TariffRate                     |                                                                                      | -0.002<br>(0.013)    | -0.001<br>(0.010)    |                      | -0.001<br>(0.013)    | 0.001<br>(0.011)     |                               | -0.005<br>(0.013)    | -0.002<br>(0.011)    |                      | 0.005<br>(0.015)     | 0.006<br>(0.011)     |
| N                              | 1351                                                                                 | 857                  | 843                  | 1347                 | 856                  | 841                  | 1343                          | 856                  | 841                  | 1237                 | 812                  | 752                  |
| Year Effects                   | NO                                                                                   | YES                  | YES                  | NO                   | YES                  | YES                  | NO                            | YES                  | YES                  | NO                   | YES                  | YES                  |
| Unit-Cluster Robust St. Errors | NO                                                                                   | YES                  | YES                  | NO                   | YES                  | YES                  | NO                            | YES                  | YES                  | NO                   | YES                  | YES                  |

\* p<0.05 \*\* p<0.01 \*\*\* p<0.001

Notes: Constants Suppressed

### Appendix I: Amount DV

These models log the amount of Chinese annual financial flows in AidData (add 1 for 0) and estimate these using linear random effect models

| DV                             | Appendix: Amount DVs (Random Effect Linear Models) |                       |                       |                    |                       |                      |
|--------------------------------|----------------------------------------------------|-----------------------|-----------------------|--------------------|-----------------------|----------------------|
|                                | log of ChnFinance                                  |                       |                       |                    |                       |                      |
| Transparency                   | 1                                                  | Raw Only              | 3                     | 4                  | Imputed               | 6                    |
| Model #                        | 1                                                  | 2                     | 3                     | 4                  | 5                     | 6                    |
| Transparency                   | -0.897**<br>(0.299)                                | -0.662*<br>(0.335)    | -0.581^<br>(0.316)    | -0.615*<br>(0.275) | -0.796**<br>(0.298)   | -0.720*<br>(0.280)   |
| DVlag                          |                                                    |                       | 0.088*<br>(0.044)     |                    |                       | 0.096**<br>(0.036)   |
| GDPpcap                        |                                                    | -0.000<br>(0.000)     | -0.000<br>(0.000)     |                    | 0.000<br>(0.000)      | 0.000<br>(0.000)     |
| GDPgrowth                      |                                                    | -0.023<br>(0.070)     | -0.032<br>(0.071)     |                    | -0.071<br>(0.047)     | -0.073<br>(0.047)    |
| BondDummy                      |                                                    | -1.046<br>(0.651)     | -0.928<br>(0.616)     |                    | -0.606<br>(0.599)     | -0.551<br>(0.569)    |
| SovDebtCrisis                  |                                                    | -2.110<br>(1.534)     | -1.853<br>(1.454)     |                    | -2.452^<br>(1.308)    | -2.186^<br>(1.196)   |
| ln_ImpsFromChn                 |                                                    | 0.525<br>(0.361)      | 0.393<br>(0.319)      |                    | 0.739**<br>(0.270)    | 0.641*<br>(0.249)    |
| ln_ExpsToChn                   |                                                    | 0.134<br>(0.242)      | 0.184<br>(0.222)      |                    | 0.001<br>(0.209)      | 0.046<br>(0.190)     |
| PTAwChn                        |                                                    | 0.552<br>(1.227)      | 0.402<br>(1.149)      |                    | 1.225<br>(1.171)      | 1.038<br>(1.080)     |
| TaiwanRecog                    |                                                    | -11.341***<br>(1.355) | -10.551***<br>(1.309) |                    | -10.485***<br>(1.096) | -9.635***<br>(1.047) |
| OilDummy                       |                                                    | -2.140^<br>(1.112)    | -2.019*<br>(1.016)    |                    | -1.152<br>(0.881)     | -1.092<br>(0.790)    |
| agreeUS                        |                                                    | 2.104<br>(5.982)      | 1.435<br>(5.535)      |                    | -1.064<br>(3.716)     | -0.774<br>(3.401)    |
| Democracy                      |                                                    | -1.115<br>(2.644)     | -0.681<br>(2.466)     |                    | -2.202<br>(2.152)     | -1.626<br>(1.970)    |
| Corruption                     |                                                    | 1.263<br>(2.103)      | 1.432<br>(1.960)      |                    | -0.789<br>(1.364)     | -0.568<br>(1.289)    |
| Left                           |                                                    | 0.870<br>(0.865)      | 0.847<br>(0.787)      |                    | 1.154^<br>(0.637)     | 1.161*<br>(0.576)    |
| TariffRate                     |                                                    | 0.062<br>(0.095)      | 0.057<br>(0.090)      |                    | 0.143<br>(0.084)      | 0.135<br>(0.077)     |
| N                              | 968                                                | 632                   | 632                   | 1522               | 1115                  | 1115                 |
| Year Effects                   | YES                                                | YES                   | YES                   | YES                | YES                   | YES                  |
| Unit-Cluster Robust St. Errors | YES                                                | YES                   | YES                   | YES                | YES                   | YES                  |

^ p<0.07 \* p<0.05 \*\* p<0.01 \*\*\* p<0.001

Notes: Constants Suppressed

### Appendix J: Transparency Not Lagged

These models ensure lagging transparency (both for theoretical reasons and the minor loss in N) is not responsible for the findings).

| HRV<br>Model #                    | Appendix: Transparency not lagged |                      |                     |                      |                      |                      |
|-----------------------------------|-----------------------------------|----------------------|---------------------|----------------------|----------------------|----------------------|
|                                   | 1                                 | Raw Only             |                     |                      | Imputed              |                      |
|                                   |                                   | 2                    | 3                   | 4                    | 5                    | 6                    |
| Transparency                      | -0.179***<br>(0.025)              | -0.200**<br>(0.062)  | -0.172**<br>(0.054) | -0.098***<br>(0.019) | -0.127*<br>(0.060)   | -0.102*<br>(0.049)   |
| DVlag                             |                                   |                      | 0.765***<br>(0.190) |                      |                      | 0.884***<br>(0.145)  |
| GDPpcap                           |                                   | 0.000***<br>(0.000)  | 0.000**<br>(0.000)  |                      | 0.000**<br>(0.000)   | 0.000**<br>(0.000)   |
| GDPgrowth                         |                                   | -0.022<br>(0.019)    | -0.024<br>(0.017)   |                      | -0.013<br>(0.012)    | -0.011<br>(0.010)    |
| BondDummy                         |                                   | -0.329**<br>(0.111)  | -0.213*<br>(0.091)  |                      | -0.326**<br>(0.107)  | -0.231**<br>(0.086)  |
| SovDebtCrisis                     |                                   | -0.306<br>(0.274)    | -0.136<br>(0.228)   |                      | -0.293<br>(0.188)    | -0.135<br>(0.159)    |
| ln_ImpsFromChn                    |                                   | -0.051<br>(0.067)    | -0.031<br>(0.049)   |                      | -0.013<br>(0.059)    | -0.008<br>(0.046)    |
| ln_ExpsToChn                      |                                   | 0.137**<br>(0.045)   | 0.137***<br>(0.035) |                      | 0.143**<br>(0.045)   | 0.123***<br>(0.034)  |
| PTAwChn                           |                                   | 0.024<br>(0.239)     | -0.053<br>(0.194)   |                      | -0.217<br>(0.193)    | -0.164<br>(0.157)    |
| TaiwanRecog                       |                                   | -1.352***<br>(0.365) | -1.076**<br>(0.359) |                      | -1.443***<br>(0.285) | -1.164***<br>(0.262) |
| OilDummy                          |                                   | -0.374<br>(0.212)    | -0.340<br>(0.176)   |                      | -0.329<br>(0.173)    | -0.266*<br>(0.133)   |
| agreeUS                           |                                   | 0.752<br>(1.196)     | 0.719<br>(0.972)    |                      | -0.837<br>(0.825)    | -0.511<br>(0.628)    |
| Democracy                         |                                   | -0.804<br>(0.548)    | -0.608<br>(0.448)   |                      | -0.547<br>(0.452)    | -0.375<br>(0.329)    |
| Corruption                        |                                   | -0.487<br>(0.481)    | -0.157<br>(0.380)   |                      | -0.307<br>(0.413)    | -0.146<br>(0.305)    |
| Left                              |                                   | 0.061<br>(0.135)     | 0.099<br>(0.107)    |                      | -0.028<br>(0.115)    | 0.004<br>(0.088)     |
| TariffRate                        |                                   | -0.012<br>(0.015)    | -0.008<br>(0.011)   |                      | 0.002<br>(0.013)     | 0.003<br>(0.010)     |
| N                                 | 869                               | 589                  | 571                 | 1358                 | 1078                 | 1055                 |
| Year Effects                      | NO                                | YES                  | YES                 | NO                   | YES                  | YES                  |
| Unit-Cluster Robust St.<br>Errors | NO                                | YES                  | YES                 | NO                   | YES                  | YES                  |

\* p<0.05 \*\* p<0.01 \*\*\* p<0.001

Notes: Constants Suppressed

### Appendix K: Simple Random Effect Models

These models check confirm that simpler linear random effect models show the same relationships as hierarchical random effect models with unit effects nested in foreign political relationships

| DV                             | Appendix: Simple Random Effects |                     |                      |                      |                    |                    |                     |                      |
|--------------------------------|---------------------------------|---------------------|----------------------|----------------------|--------------------|--------------------|---------------------|----------------------|
|                                | All                             | NoIMF               | West                 | OECD Bilat           | All                | NoIMF              | West                | OECD Bilat           |
| HRV                            | Raw Only                        |                     |                      |                      | Imputed            |                    |                     |                      |
| Model #                        | 1                               | 2                   | 3                    | 4                    | 5                  | 6                  | 7                   | 8                    |
| Transparency                   | -0.032**<br>(0.010)             | -0.032**<br>(0.010) | -0.035***<br>(0.010) | -0.052**<br>(0.016)  | -0.027*<br>(0.012) | -0.028*<br>(0.012) | -0.029**<br>(0.011) | -0.049**<br>(0.015)  |
| DVlag                          | 0.126*<br>(0.053)               | 0.152**<br>(0.051)  | 0.146**<br>(0.057)   | 0.216***<br>(0.061)  | 0.090*<br>(0.040)  | 0.093*<br>(0.041)  | 0.111**<br>(0.038)  | 0.164***<br>(0.038)  |
| GDPpcap                        | 0.000**<br>(0.000)              | 0.000*<br>(0.000)   | 0.000**<br>(0.000)   | 0.000*<br>(0.000)    | 0.000**<br>(0.000) | 0.000**<br>(0.000) | 0.000***<br>(0.000) | 0.000***<br>(0.000)  |
| GDPgrowth                      | -0.002<br>(0.004)               | -0.002<br>(0.004)   | -0.003<br>(0.005)    | -0.004<br>(0.005)    | -0.002<br>(0.002)  | -0.002<br>(0.002)  | -0.001<br>(0.003)   | -0.002<br>(0.004)    |
| BondDummy                      | -0.029<br>(0.019)               | -0.028<br>(0.019)   | -0.032<br>(0.022)    | -0.092**<br>(0.034)  | -0.022<br>(0.020)  | -0.020<br>(0.020)  | -0.017<br>(0.020)   | -0.061<br>(0.032)    |
| SovDebtCrisis                  | 0.034<br>(0.037)                | 0.059<br>(0.043)    | 0.000<br>(0.040)     | -0.023<br>(0.087)    | 0.029<br>(0.029)   | 0.057<br>(0.032)   | 0.006<br>(0.034)    | -0.089<br>(0.089)    |
| ln_ImpsFromChn                 | -0.016<br>(0.017)               | -0.015<br>(0.017)   | -0.019<br>(0.017)    | -0.025<br>(0.022)    | -0.003<br>(0.015)  | -0.003<br>(0.016)  | -0.011<br>(0.016)   | -0.013<br>(0.021)    |
| ln_ExpsToChn                   | 0.026**<br>(0.010)              | 0.026*<br>(0.010)   | 0.029**<br>(0.011)   | 0.034**<br>(0.013)   | 0.020*<br>(0.009)  | 0.019*<br>(0.009)  | 0.024*<br>(0.010)   | 0.018<br>(0.012)     |
| PTAwChn                        | 0.009<br>(0.036)                | 0.000<br>(0.037)    | -0.003<br>(0.036)    | -0.006<br>(0.051)    | 0.022<br>(0.041)   | 0.020<br>(0.041)   | 0.016<br>(0.041)    | 0.061<br>(0.045)     |
| TaiwanRecog                    | -0.082<br>(0.043)               | -0.093*<br>(0.046)  | -0.108*<br>(0.043)   | -0.377***<br>(0.064) | -0.081<br>(0.046)  | -0.085<br>(0.048)  | -0.100*<br>(0.045)  | -0.321***<br>(0.055) |
| OilDummy                       | -0.055<br>(0.039)               | -0.061<br>(0.039)   | -0.076*<br>(0.039)   | -0.225***<br>(0.067) | -0.032<br>(0.041)  | -0.034<br>(0.042)  | -0.030<br>(0.042)   | -0.136*<br>(0.067)   |
| agreeUS                        | 0.239<br>(0.240)                | 0.319<br>(0.228)    | 0.295<br>(0.231)     | 0.549<br>(0.332)     | -0.005<br>(0.172)  | 0.028<br>(0.170)   | -0.021<br>(0.179)   | 0.048<br>(0.271)     |
| Democracy                      | -0.261<br>(0.139)               | -0.239<br>(0.133)   | -0.268<br>(0.138)    | -0.075<br>(0.134)    | -0.231*<br>(0.115) | -0.219<br>(0.115)  | -0.260*<br>(0.115)  | -0.101<br>(0.118)    |
| Corruption                     | -0.046<br>(0.100)               | -0.043<br>(0.099)   | -0.028<br>(0.099)    | -0.063<br>(0.117)    | -0.028<br>(0.079)  | -0.019<br>(0.079)  | -0.041<br>(0.081)   | 0.034<br>(0.105)     |
| Left                           | 0.029<br>(0.025)                | 0.033<br>(0.026)    | 0.030<br>(0.027)     | 0.037<br>(0.040)     | 0.012<br>(0.020)   | 0.018<br>(0.020)   | 0.008<br>(0.023)    | 0.058<br>(0.031)     |
| TariffRate                     | 0.001<br>(0.003)                | 0.002<br>(0.003)    | 0.000<br>(0.003)     | 0.003<br>(0.003)     | 0.004*<br>(0.002)  | 0.005*<br>(0.002)  | 0.004<br>(0.002)    | 0.005<br>(0.003)     |
| N                              | 579                             | 577                 | 577                  | 510                  | 998                | 991                | 995                 | 869                  |
| Year Effects                   | YES                             | YES                 | YES                  | YES                  | YES                | YES                | YES                 | YES                  |
| Unit-Cluster Robust St. Errors | YES                             | YES                 | YES                  | YES                  | YES                | YES                | YES                 | YES                  |

\* p<0.05 \*\* p<0.01 \*\*\* p<0.001  
Notes: Constants Suppressed
